# Supplementary material for: Oxide–oxide nanojunctions in coaxial SnO2/TiO2, SnO2/V2O3 and SnO2/(Ti0.5V0.5)2O3 nanowire heterostructures
Source: Royal Society of Chemistry journal article supplement (doi:10.1039/c3ce26672a), 2013-01-01
Supplement: c3ce26672a.pdf [file c3ce26672a.pdf]

## Supplementary Information

### Oxide-Oxide Nanojunctions in coaxial SnO<sub>2</sub>/TiO<sub>2</sub>, SnO<sub>2</sub>/V<sub>2</sub>O<sub>3</sub> and SnO<sub>2</sub>/(Ti<sub>0.5</sub>V<sub>0.5</sub>)<sub>2</sub>O<sub>3</sub> Nanowire Heterostructures

Reza Zamani,<sup>a,b</sup> Raquel Fiz,<sup>c</sup> Jun Pan,<sup>c</sup> Thomas Fischer,<sup>c</sup> Sanjay Mathur,<sup>\*c</sup> Joan Ramon Morante<sup>\*b,d</sup> and Jordi Arbiol<sup>\*a,e</sup>

<sup>a</sup> Institut de Ciència de Materials de Barcelona, ICMA-B-CSIC, E-08193 Bellaterra, CAT, Spain; E-mail: [arbiol@icrea.cat](mailto:arbiol@icrea.cat)

<sup>b</sup> Catalonia Institute for Energy Research (IREC), E-08930 Sant Adrià del Besòs, CAT, Spain; E-mail: [jrmorante@irec.cat](mailto:jrmorante@irec.cat)

<sup>c</sup> Institute of Inorganic Chemistry, University of Cologne, Cologne, Germany; E-mail: [sanjay.mathur@uni-koeln.de](mailto:sanjay.mathur@uni-koeln.de)

<sup>d</sup> Departament d'Electrònica, Universitat de Barcelona, E-08028 Barcelona, CAT, Spain

<sup>e</sup> Institució Catalana de Recerca i Estudis Avançats (ICREA), E-08010 Barcelona, CAT, Spain

#### CONTENTS Page

|                                                                                                                                                                                                                                                                 |   |
|-----------------------------------------------------------------------------------------------------------------------------------------------------------------------------------------------------------------------------------------------------------------|---|
| <b>S1.</b> Atomic simulation of the interfaces between rutile SnO <sub>2</sub> NW core and different shells: (a) Ti <sub>2</sub> O, (b) Ti <sub>2</sub> O <sub>3</sub> , (c) TiO <sub>2</sub> rutile and (d) TiO <sub>2</sub> anatase. <b>(Figure S1)</b> ..... | 2 |
| <b>S2.</b> Formation mechanism of SnO <sub>2</sub> - based heterostructures. <b>(Figure S2)</b> .....                                                                                                                                                           | 2 |
| <b>S3.</b> In-situ mass spectrometrical analysis of the gas phase during the deposition process. <b>(Figure S3)</b> .....                                                                                                                                       | 3 |

**S1. Atomic simulation of the interfaces between rutile SnO<sub>2</sub> NW core and different shells: (a) Ti<sub>2</sub>O, (b) Ti<sub>2</sub>O<sub>3</sub>, (c) TiO<sub>2</sub> rutile and (d) TiO<sub>2</sub> anatase.**

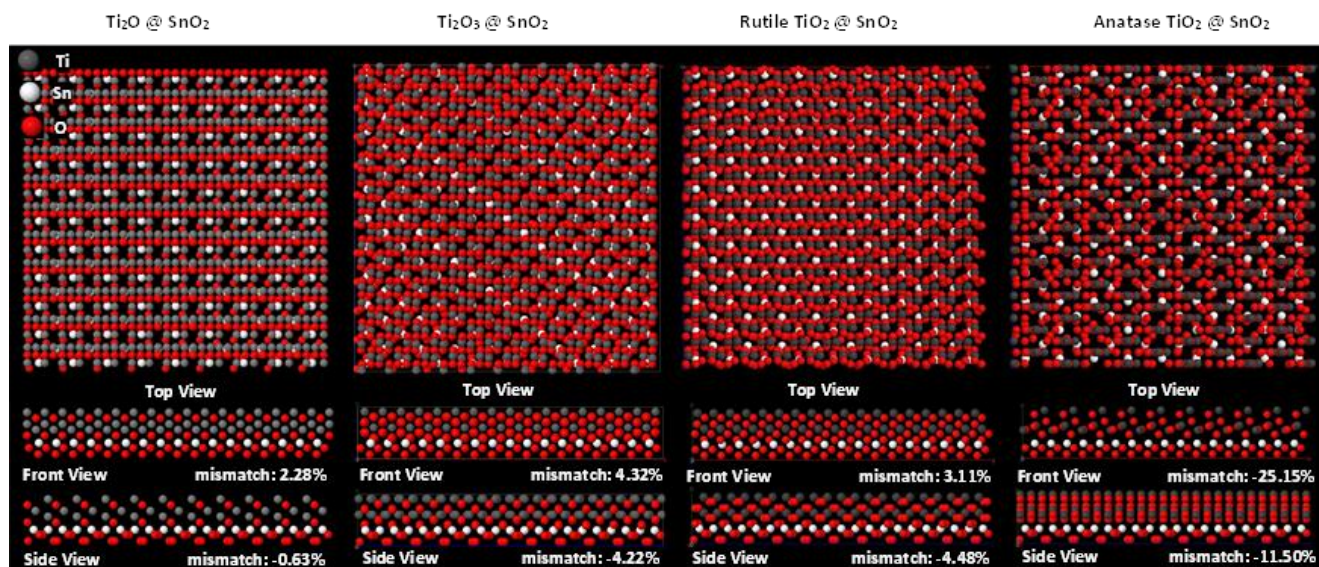

**Figure S1.** Atomic simulation of the interfaces between rutile SnO<sub>2</sub> NW core and different shells: (a) Ti<sub>2</sub>O, (b) Ti<sub>2</sub>O<sub>3</sub>, (c) TiO<sub>2</sub> rutile and (d) TiO<sub>2</sub> anatase. Top views show the [10-10]<sub>Ti2O</sub> // [0-11]<sub>SnO2</sub> in the case of Ti<sub>2</sub>O on SnO<sub>2</sub>, [11-20]<sub>Ti2O3</sub> // [0-11]<sub>SnO2</sub> zone axis in the case of Ti<sub>2</sub>O<sub>3</sub> on SnO<sub>2</sub> and [0-11]<sub>TiO2</sub> // [0-11]<sub>SnO2</sub> in the case of TiO<sub>2</sub> rutile and anatase on SnO<sub>2</sub>. Front views are visualized along the [0001]<sub>Ti2O/Ti2O3</sub> // [100]<sub>SnO2</sub> zone axis in the case of Ti<sub>2</sub>O and Ti<sub>2</sub>O<sub>3</sub> on SnO<sub>2</sub>, and along the [100]<sub>TiO2</sub> // [100]<sub>SnO2</sub> zone axis in the case of TiO<sub>2</sub> rutile and anatase on SnO<sub>2</sub>. Finally, the side view corresponds to the [-12-10]<sub>Ti2O</sub> // [011]<sub>SnO2</sub>, [-1100]<sub>Ti2O3</sub> // [011]<sub>SnO2</sub> and [011]<sub>TiO2 anat/rutile</sub> // [011]<sub>SnO2</sub> directions. In each case mismatch percentage is indicated under the model.

**S2. Formation mechanism of SnO<sub>2</sub>- based heterostructures.**

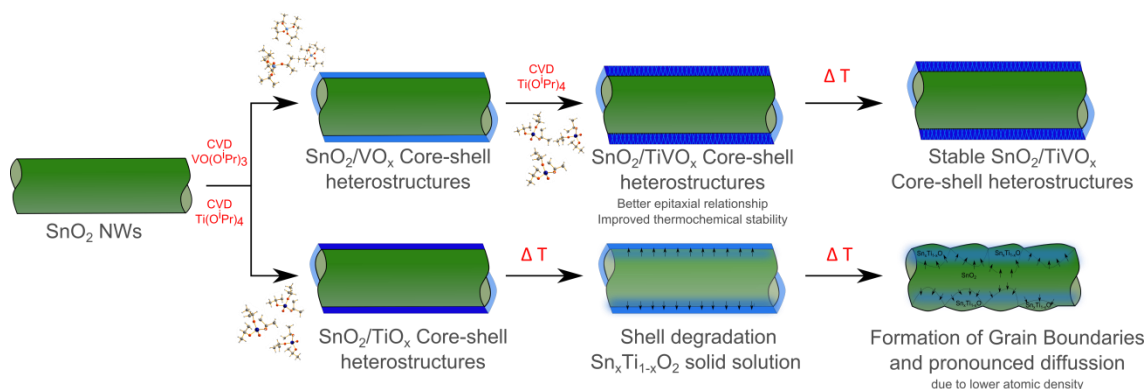

**Figure S2.** Formation mechanism of SnO<sub>2</sub>- based heterostructures. While titania shells degrade, vanadia overlayers show improved epitaxial relationships and thermochemical stability.

### S3. In-situ mass spectrometrical analysis of the gas phase during the deposition process.

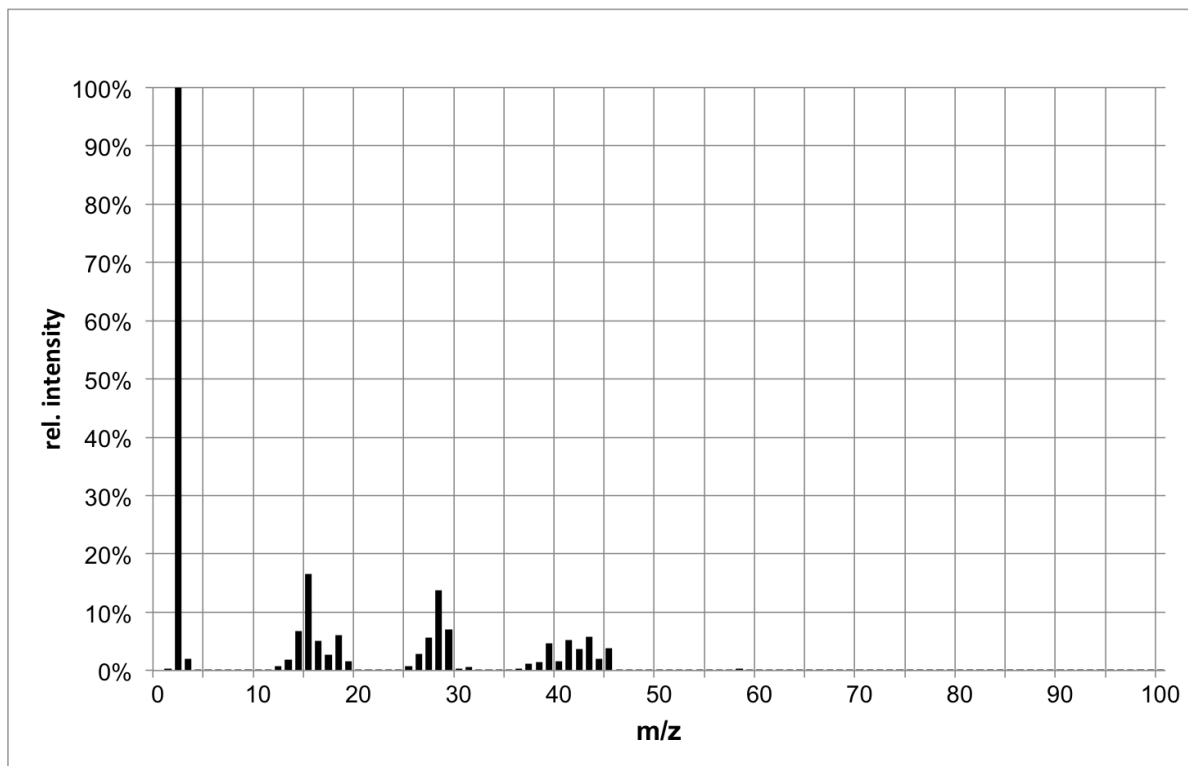

**Figure S3.** *In-situ* mass spectrometrical analysis of the gas phase during the deposition process of  $\text{Ti}(\text{OPr})_4$ :  $m/z=2$  ( $\text{H}_2^+$ ), 18 ( $\text{H}_2\text{O}^+$ ), 15 ( $\text{CH}_3^+$ ), 42 ( $\text{C}_3\text{H}_5^+$ ), 45 ( $\text{C}_2\text{H}_6\text{O}^+$ ), 59 ( $\text{C}_3\text{H}_7\text{O}^+$ ).
